# Supplementary material for: A de novo missense variant in EZH1 associated with developmental delay exhibits functional deficits in Drosophila melanogaster
Source: PubMed Central journal article supplement — medRxiv. 2023 Feb 3:2023.01.31.23285113. Preprint. [Version 1] doi: 10.1101/2023.01.31.23285113 (PMC9915809; doi:10.1101/2023.01.31.23285113), 2023-02-03
Supplement: media-1.pdf [file media-1.pdf]

# Supplementary data

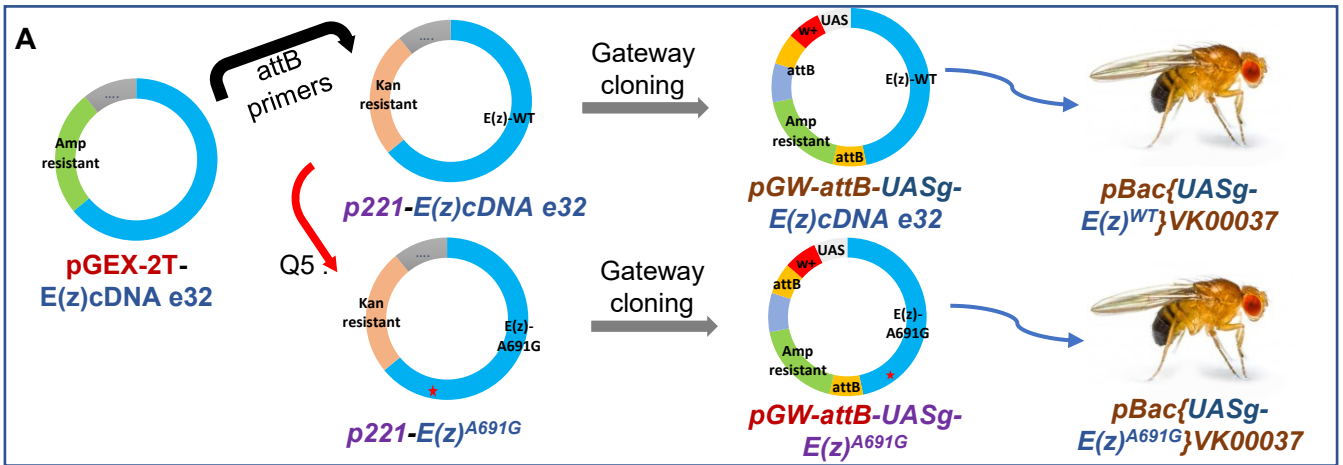

**B**

|                                 | <i>Actin-GAL4</i><br>Strong Ubiquitous |      |      | <i>daughterless-GAL4</i><br>Week Ubiquitous |      | <i>Elav-GAL4</i><br>Neuronal Specific | <i>nubbin-GAL4</i><br>Wings and legs specific |      |
|---------------------------------|----------------------------------------|------|------|---------------------------------------------|------|---------------------------------------|-----------------------------------------------|------|
| Temperatures                    | 18°C                                   | 25°C | 29°C | 18°C                                        | 29°C | 25°C                                  | 18°C                                          | 29°C |
| <i>UAS-lacZ (control)</i>       | No phenotype seen                      |      |      |                                             |      |                                       |                                               |      |
| <i>UAS-E(z)<sup>WT</sup></i>    | No visible phenotype seen              |      |      |                                             |      |                                       |                                               |      |
| <i>UAS-E(z)<sup>A691G</sup></i> | No visible phenotype seen              |      |      |                                             |      |                                       |                                               |      |
