# Supplementary material for: A de novo missense variant in EZH1 associated with developmental delay exhibits functional deficits in Drosophila melanogaster
Source: PubMed Central journal article supplement — medRxiv. 2023 Feb 3:2023.01.31.23285113. Preprint. [Version 1] doi: 10.1101/2023.01.31.23285113 (PMC9915809; doi:10.1101/2023.01.31.23285113), 2023-02-03

# Supplementary data

Ken Scott Lab  
Human cDNA  
Collection -  
IOH-10021

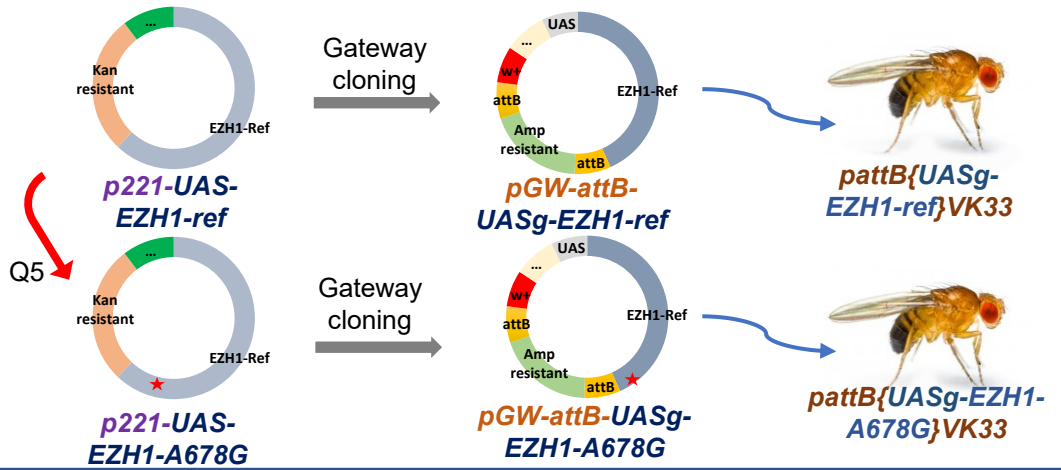

Supplement: media-2.pdf [file media-2.pdf]
