# Supplementary material for: A de novo missense variant in EZH1 associated with developmental delay exhibits functional deficits in Drosophila melanogaster
Source: PubMed Central journal article supplement — medRxiv. 2023 Feb 3:2023.01.31.23285113. Preprint. [Version 1] doi: 10.1101/2023.01.31.23285113 (PMC9915809; doi:10.1101/2023.01.31.23285113), 2023-02-03
Supplement: media-3.pdf [file media-3.pdf]

# Supplementary data

Q5  
mutagenesis

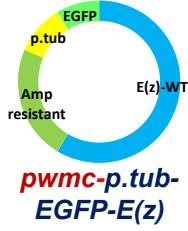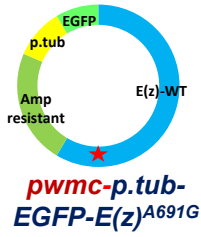

Restriction  
Digestion

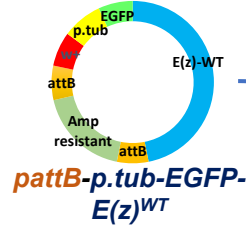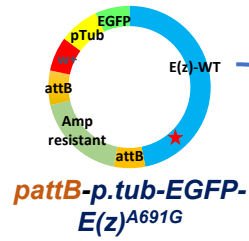

Restriction  
Digestion

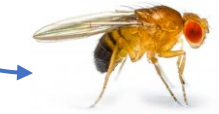

*pattB{p.tub-EGFP-E(z)<sup>WT</sup>}VK37*

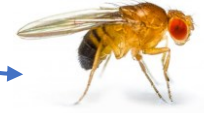

*pattB{p.tub-EGFP-E(z)<sup>A691G</sup>}VK37*
