# Supplementary material for: A de novo missense variant in EZH1 associated with developmental delay exhibits functional deficits in Drosophila melanogaster
Source: PubMed Central journal article supplement — medRxiv. 2023 Feb 3:2023.01.31.23285113. Preprint. [Version 1] doi: 10.1101/2023.01.31.23285113 (PMC9915809; doi:10.1101/2023.01.31.23285113), 2023-02-03
Supplement: media-4.pdf [file media-4.pdf]

## Supplementary Figure Legends:

**Supplementary Figure 1: Generation of the  $E(z)^{A691}$  transgenic flies under the UAS-promotor.** A: Generation of the  $E(z)^{A691}$  transgenic flies: Original  $E(z)$ -cDNA construct –  $pGEX-2T\{E(z)cDNA\ e32\}$  was kindly gifted by Dr. Richard Jones, University of Dallas, Texas, USA. The  $attB$ - $E(z)$  primers were designed to clone into the  $pENTR$ -221 vector with the help of Gateway™ BP Clonase™ II Enzyme mix (Thermo Fischer-11789100). The variant primers were prepared, and the variant was generated with a Q5 mutagenesis (NEB- E0554S) as previously explained in (Tsang et al. 2016). After confirming via sequencing analysis,  $pENTR$ -221- $E(z)cDNA^{WT}$  and  $pENTR$ -221- $E(z)^{A691G}$  were cloned into  $pGW.attB$  vector by using Gateway™ LR Clonase™ II Enzyme mix (Thermo Fischer-11791020). Sequence-verified wild-type and variant constructs were then microinjected in VK00037 attP docking site embryos to generate  $pBac\{UASg-E(z)^{WT}\}VK00037$  and  $pBac\{UASg-E(z)^{A691G}\}VK00037$  transgenic lines. Table B: Overexpression assay: performed with different  $GAL4$  lines at different temperatures

**Supplementary Figure 2: Generation of the human  $EZH1$ -cDNA transgenic flies under UAS promotor:** Human cDNA “ $IOH10021$ ” from the Ken Scott collection was used for these constructs. By designing the site-specific primers, the variant was generated with a Q5 mutagenesis protocol (NEB- E0554S) and after confirming via Sanger sequencing analysis, both the  $pENTR$ -221- $EZH1^{ref}$  and  $pENTR$ -221- $EZH1^{A678G}$  constructs were cloned into  $pGW$ - $\{UASg\}$  vector by using LR Clonase™ II (Thermo Fischer-11791020). Sequence-verified  $pattB\{UAS-EZH1^{ref}\}$  &  $pattB\{UAS-EZH1^{A678G}\}$  constructs were microinjected into VK00033 docking site embryos to generate  $pBac\{UAS-EZH1^{ref}\}VK00033$  &  $pBac\{UAS-EZH1^{A678G}\}VK00033$ .

**Supplementary Figure 3: Generation of the  $E(z)^{A691}$  transgenic flies under the constitutively active tubulin promotor.**  $pwmc\{ptub:EGFP::E(z)\}$  construct and flies were gifted by Dr. Leonie Ringrose, IRI Life Sciences, Berlin, Germany. The wildtype construct underwent mutagenesis. The variant was generated with a Q5 mutagenesis protocol (NEB- E0554S). Both wild-type and variant constructs underwent restriction digestion with NotI (NEB- R3189S) and XbaI (NEB-R0145S) and then ligated into the  $pattB$ -Basler vector with the T4 DNA ligase (NEB M0202S). Sequenced varified  $pattB\{ptub:EGFP::E(z)^{WT}\}$ , and  $pattB\{ptub:EGFP::E(z)^{A691G}\}$  then microinjected in  $\phi c31$  mediated VK00037 docking site embryos to generate  $pBac\{ptub:EGFP::E(z)^{WT}\}VK00037$  and  $pBac\{ptub:EGFP::E(z)^{A691G}\}VK00037$  transgenic flies.
